# Supplementary material for: LncRNA CTBP1-DT-encoded microprotein DDUP sustains DNA damage response signalling to trigger dual DNA repair mechanisms
Source: PubMed Central journal article supplement — Nucleic Acids Res. 2022 Jul 18;50(14):8060–79. doi: 10.1093/nar/gkac611 (PMC9371908; doi:10.1093/nar/gkac611), 2022-07-18
Supplement: gkac611_supplemental_file.pdf [file gkac611_supplemental_file.pdf]

**Supplementary information for**

**LncRNA CTBP1-DT-encoded microprotein DDUP sustains DNA damage response signalling to  
trigger dual DNA repair mechanisms**

Ruyuan Yu <sup>1,2, §</sup>, Yameng Hu <sup>1,2, §</sup>, Shuxia Zhang <sup>1,2, §</sup>, Xincheng Li <sup>1,2</sup>, Miaoling Tang <sup>1,2</sup>, Meisongzhu  
Yang <sup>1,2</sup>, Xingui Wu <sup>1,2</sup>, Ziwen Li <sup>1,2</sup>, Xinyi Liao <sup>1,2</sup>, Yingru Xu <sup>1,2</sup>, Man Li <sup>1,2</sup>, Suwen Chen <sup>1,2</sup>, Wanying  
Qian<sup>1,2</sup>, Li-Yun Gong<sup>4</sup>, Libing Song<sup>3</sup>, Jun Li <sup>1,2, \*</sup>

**Correspondence to:** Jun Li

E-mail: [lijun37@mail.sysu.edu.cn](mailto:lijun37@mail.sysu.edu.cn)

Supplementary Figure S1

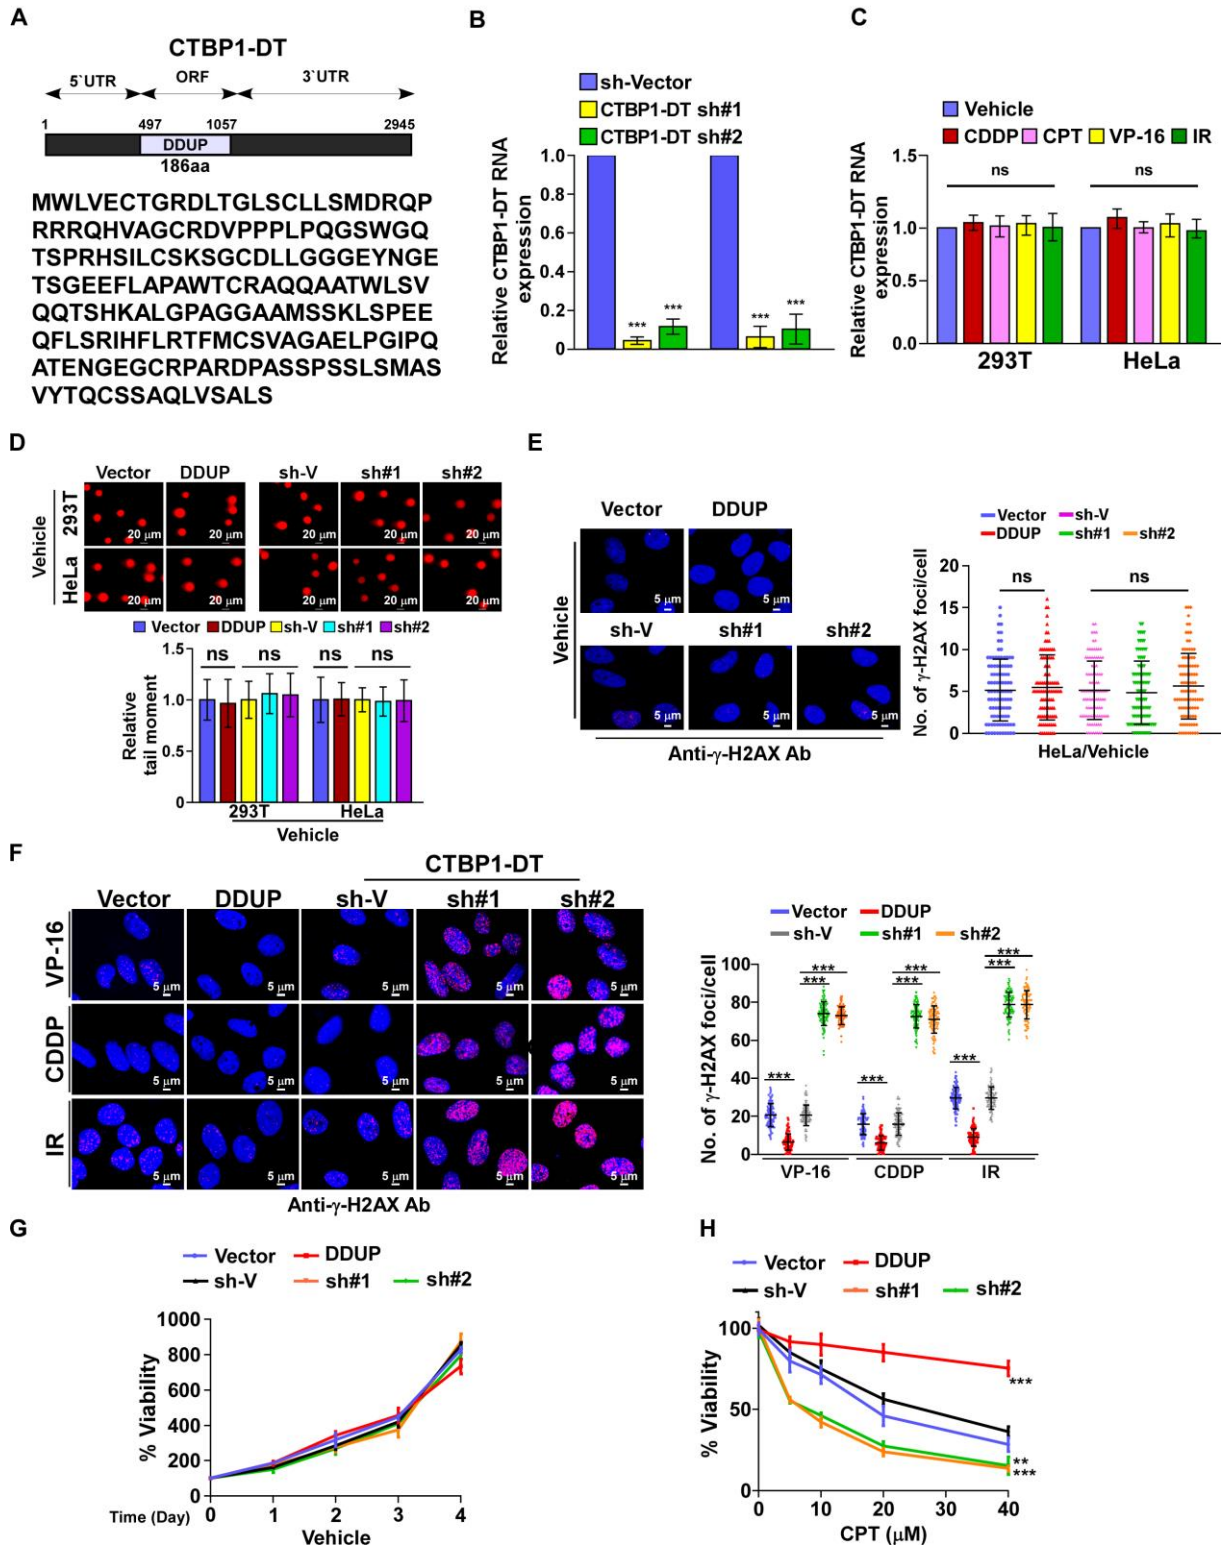

**Supplementary Figure S1. LncRNA CTBP1-DT-encoded DDUP microprotein promotes DNA damage repair.** **A.** Diagram of the 5'- and 3'-untranslated regions (UTRs) and the open reading frame (ORF) in human lncRNA CTBP1-DT (upper) and the corresponding 186 amino acid (aa) sequence (lower). **B.** Real-time PCR analysis of CTBP1-DT expression in sh-vector- and CTBP1-DT shRNA-transduced cells. GAPDH served as a control. **C.** Real-time PCR analysis of CTBP1-DT expression in

the indicated cells treated with CPT (10  $\mu$ M) or VP-16 (10  $\mu$ M) or CDDP (5  $\mu$ M) for 1 hour or with IR (10 Gy) and were allowed to recover for six hours. GAPDH served as a loading control. **D.** Representative images (left) and quantification (right) of damaged DNA in the indicated vehicle-treated cells determined by comet assay ( $n = 100$ ). Scale bar = 20  $\mu$ m. **E.** Representative images (left) and quantification (right) of  $\gamma$ -H2AX foci in the indicated cells with vehicle treatment. At least 100 cells were counted. Scale bar = 5  $\mu$ m. **F.** Representative images (left) and quantification (right) of  $\gamma$ -H2AX foci in the indicated cells treated with CPT (10  $\mu$ M), VP-16 (10  $\mu$ M), CDDP (5  $\mu$ M) for 1 hour or IR (10 Gy) (>100 counted cells). Scale bar = 5  $\mu$ m. **G-H.** MTT assay analysis of indicated cell survival in response to vehicle (G) or CPT(H) treatment at the indicated concentration. Each error bar represents the mean  $\pm$  SD of three independent experiments (\* $p < 0.05$ , \*\* $p < 0.01$ , \*\*\* $p < 0.001$ ).

Supplementary Figure S2

A

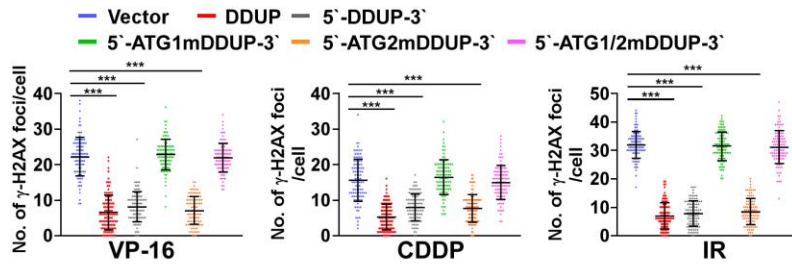

B

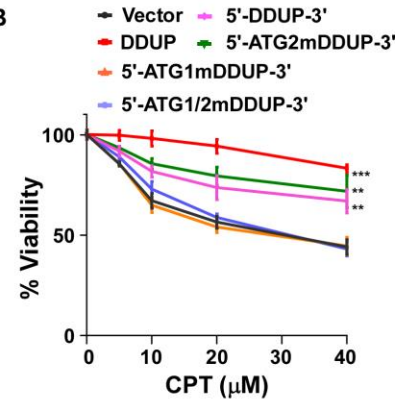

C

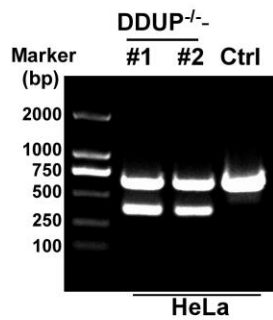

D

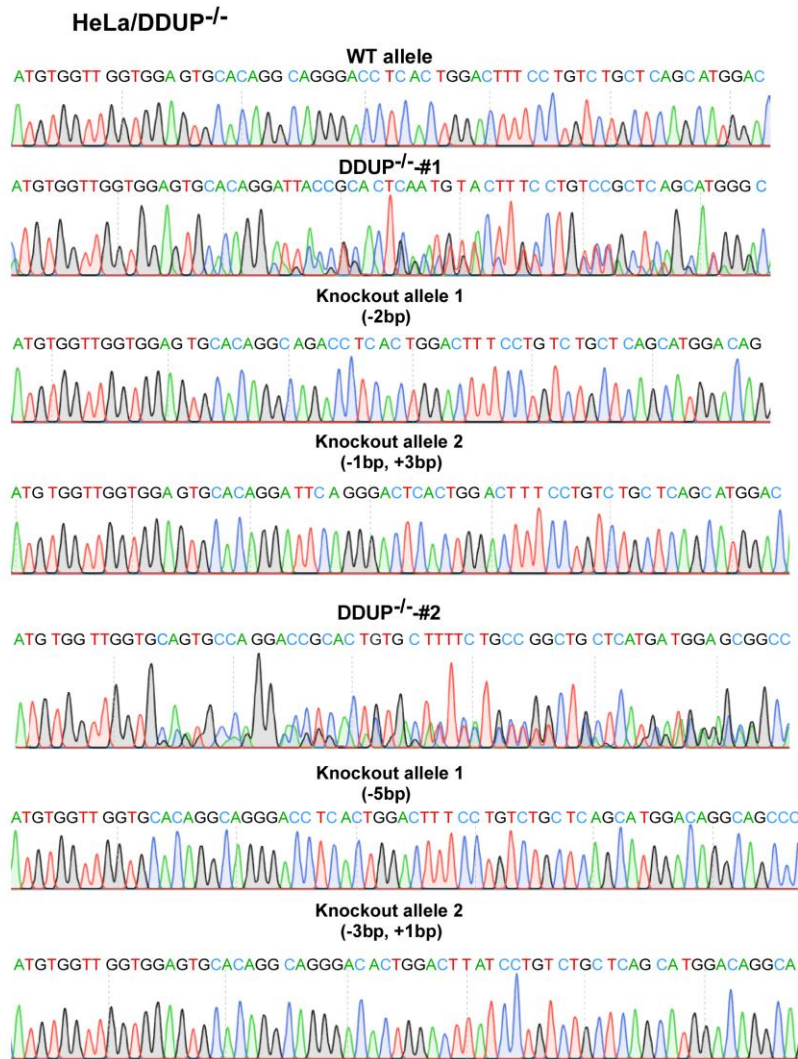

E

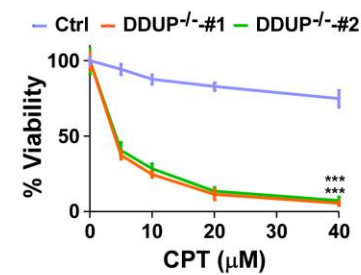

F

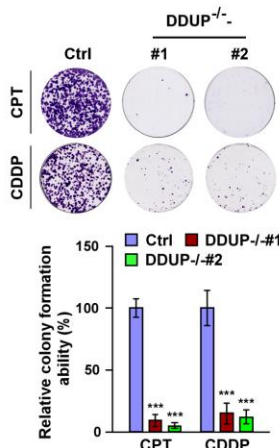

Supplementary Figure S2 Microprotein DDUP, but not CTBP1-DT RNA, promotes DNA damage repair.

**A.** Quantification of  $\gamma$ -H2AX foci in the indicated cells treated with CPT (10  $\mu$ M), VP-16 (10  $\mu$ M), CDDP (5  $\mu$ M) for 1 hour, or IR (10 Gy) (>100 counted cells). **B.** MTT assay analysis of indicated cell survival in response to CPT treatment at the indicated concentration. **C.** Mutagenesis of target sites revealed by the presence of a PCR product with 300 bp digestion products in T7 endonuclease 1 (T7E1) assays in HeLa/DDUP<sup>-/-</sup>#1 and DDUP<sup>-/-</sup>#2 cells. **D.** Genomic DNA sequence analysis showing that

homozygous DDUP deletion occurred downstream of the neighbouring start codon (ATG) in HeLa/DDUP<sup>-/-</sup>-#1 and DDUP<sup>-/-</sup>-#2 cells. **E.** MTT assay analysis of the survival of control and DDUP-KO cells in response to CPT treatment at the indicated concentration. **F.** Representative images (upper) and quantification (lower) of the colony formation ability of the indicated cells treated with CPT (10  $\mu$ M) or CDDP (5  $\mu$ M), as determined by a colony-formation assay. Each error bar represents the mean  $\pm$  SD of three independent experiments (\* $p$  < 0.05, \*\* $p$  < 0.01, \*\*\* $p$  < 0.001).

### Supplementary Figure S3

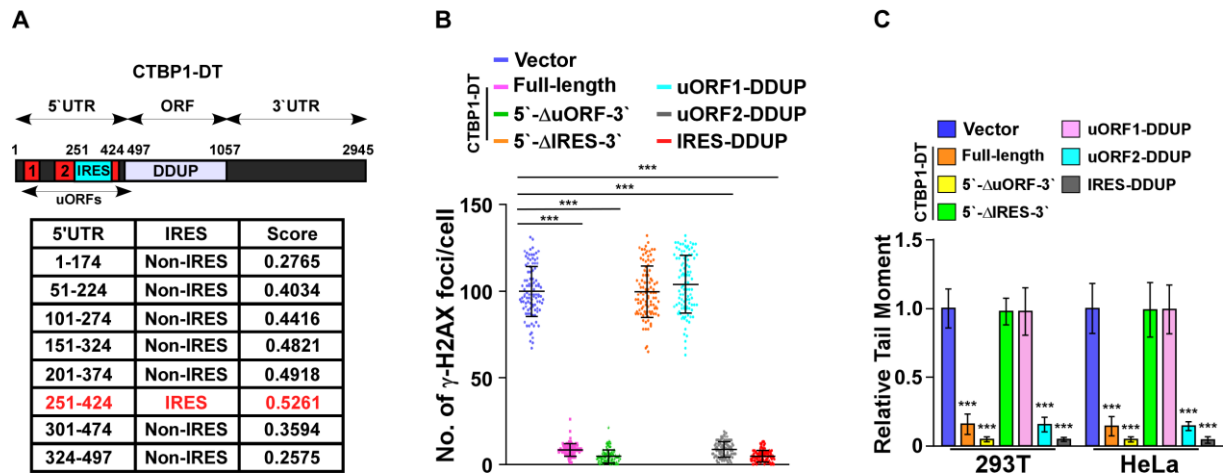

**Supplementary Figure S3. The IRES in the 5'UTR of CTBP1-DT is essential for DNA damage-induced DDUP translation.** **A.** Upper: Diagram of uORFs, putative IRES and DDUP-coding regions in CTBP1-DT RNA. Lower: IRESfinder was used to predict the potential IRES region in the 5'UTR of CTBP1-DT RNA. **B.** Quantification of  $\gamma$ -H2AX foci in HeLa cells with CPT (10  $\mu$ M, 1h) (>100 counted cells). **C.** Quantification of damaged DNA in the indicated cells with CPT (10  $\mu$ M, 1h) analyzed by comet assay ( $n = 100$ ). Each error bar represents the mean  $\pm$  SD of three independent experiments (\* $p < 0.05$ , \*\* $p < 0.01$ , \*\*\* $p < 0.001$ ).

Supplementary Figure S4

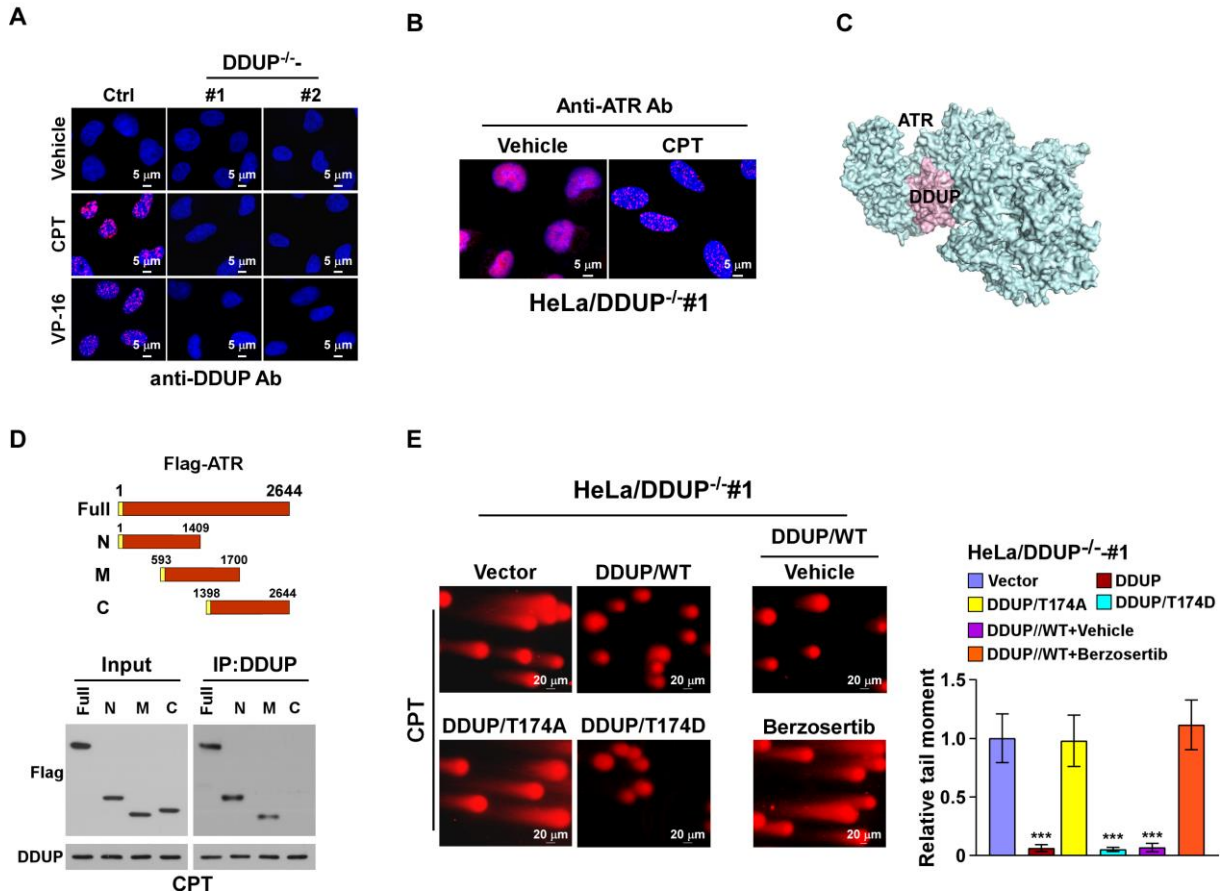

**Supplementary Figure S4. Phosphorylation of DDUP is essential for DDUP-mediated damage repair.** **A.** IF staining using anti-DDUP antibody in vehicle-, or CPT (10  $\mu$ M)-, or VP-16 (10  $\mu$ M)-treated control and DDUP-KO HeLa cells. **B.** IF staining of ATR foci in vehicle- and CPT (10  $\mu$ M, 1h)-treated DDUP-KO HeLa cells. **C.** Molecular docking between ATR and DDUP performed using the Cluspro 2.0 web server (<https://cluspro.org/help.php>) shown in cartoon representation. **D.** Co-IP assay analysis of the DDUP-interacting region in ATR using anti-ATR antibody in CPT-treated (10  $\mu$ M, 1h) 293T cells transfected with full-length or truncated ATR fragments (right). **E.** Representative images (left) and quantification (right) of damaged DNA in the indicated cells analysed by comet assay ( $n = 100$ ). The indicated cells were pre-treated with or without berzosertib (80 nM) for 1 hour, and then treated with CPT (10  $\mu$ M) for 1 hour. Each error bar represents the mean  $\pm$  SD of three independent experiments ( $*p < 0.05$ ,  $**p < 0.01$ ,  $***p < 0.001$ ).



Supplementary Figure S5

A

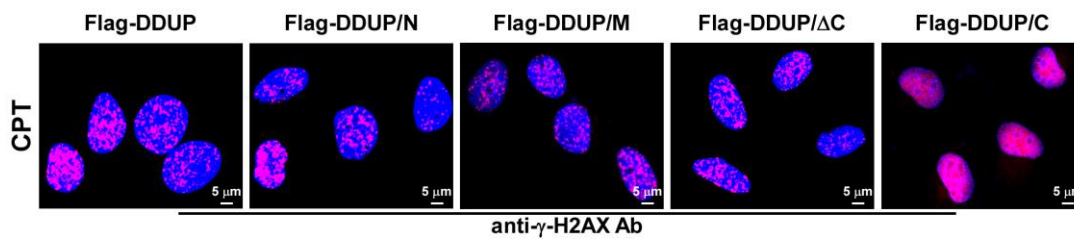

B

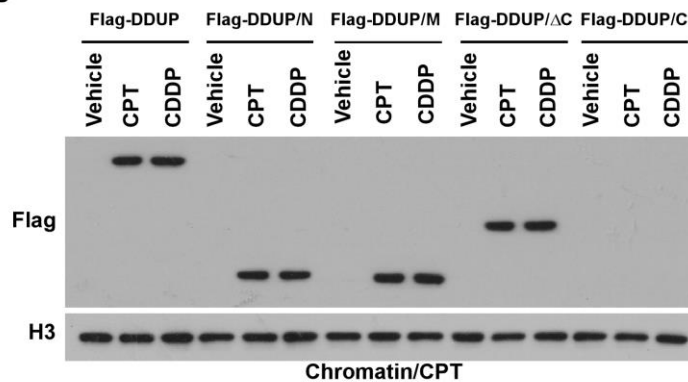

C

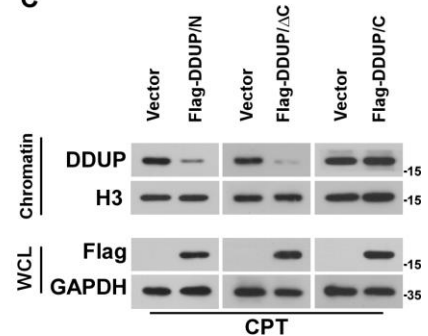

D

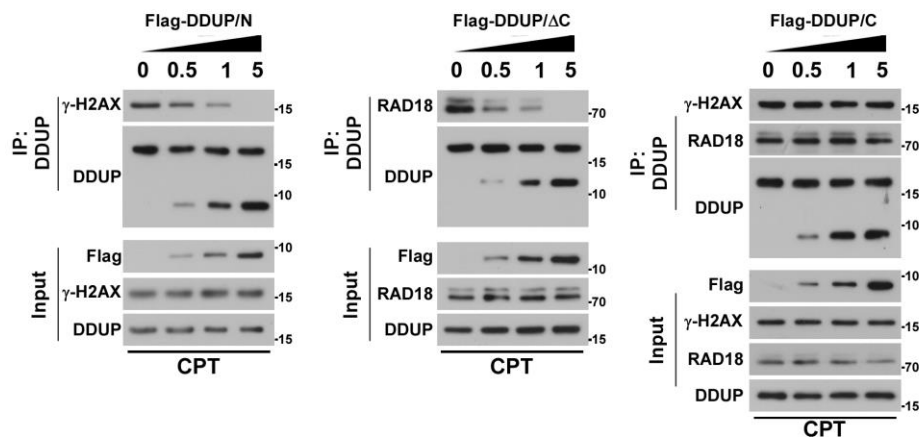

**Supplementary Figure S5. Phosphorylated DDUP forms a complex with γ-H2AX and RAD18. A.**

IF staining analysis of the expression of the indicated truncated DDUP protein in CPT (10 μM, 1h)-treated HeLa cells. **B.** Chromatin fraction and IB analysis of expression of DDUP/WT, DDUP/N, DDUP/M, DDUP/ΔC, and DDUP/C in chromatin in CPT (10 μM, 1h)-treated 293T cells. H3 served as a loading control. **C.** IB analysis of DNA-bound endogenous DDUP expression in chromatin fraction (upper) and whole cell lysates (lower) extracted from CPT (10 μM, 1h)-treated 293T cells transfected with DDUP/N, DDUP/ΔC or DDUP/C. H3 served as a loading control for chromatin fractions and GAPDH served as a loading control for whole cell lysates. **D.** Co-IP assay analyses of the DDUP/γ-H2AX interaction in CPT (10 μM, 1h)-treated 293T cells transfected with Flag-tagged DDUP/N (0, 0.5, 1.0, 5.0 μg), the



DDUP/RAD18 interaction in CPT (10  $\mu$ M, 1h)-treated 293T cells transfected with Flag-tagged DDUP/ $\Delta$ C (0, 0.5, 1.0, 5.0  $\mu$ g), and formation of the DDUP/ $\gamma$ -H2AX/RAD18 complex in CPT (10  $\mu$ M, 1h)-treated 293T cells transfected with Flag-tagged DDUP/C (0, 0.5, 1.0, 5.0  $\mu$ g). The detailed technical information was described in the Material and Methods section.

Supplementary Figure S6

A

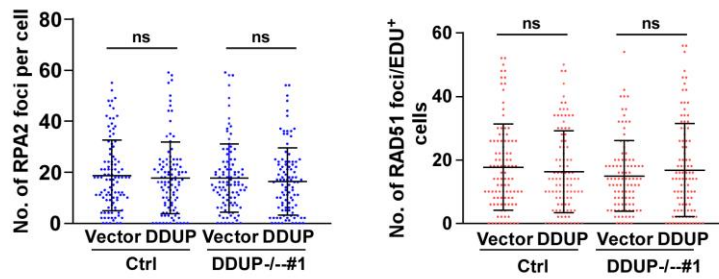

B

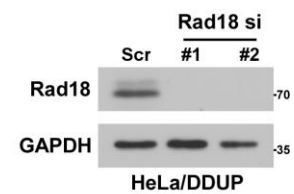

C

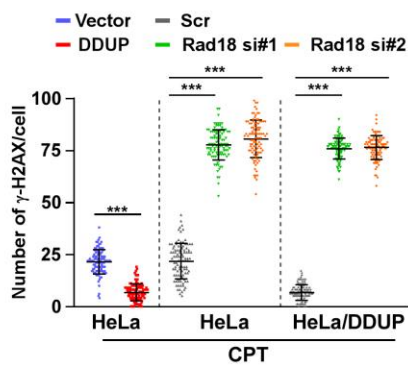

D

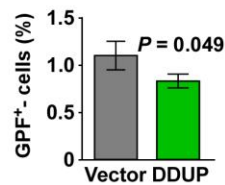

E

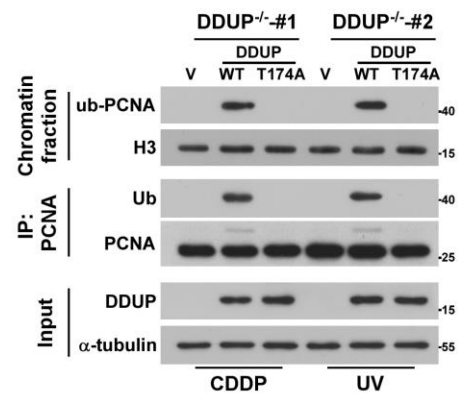

F

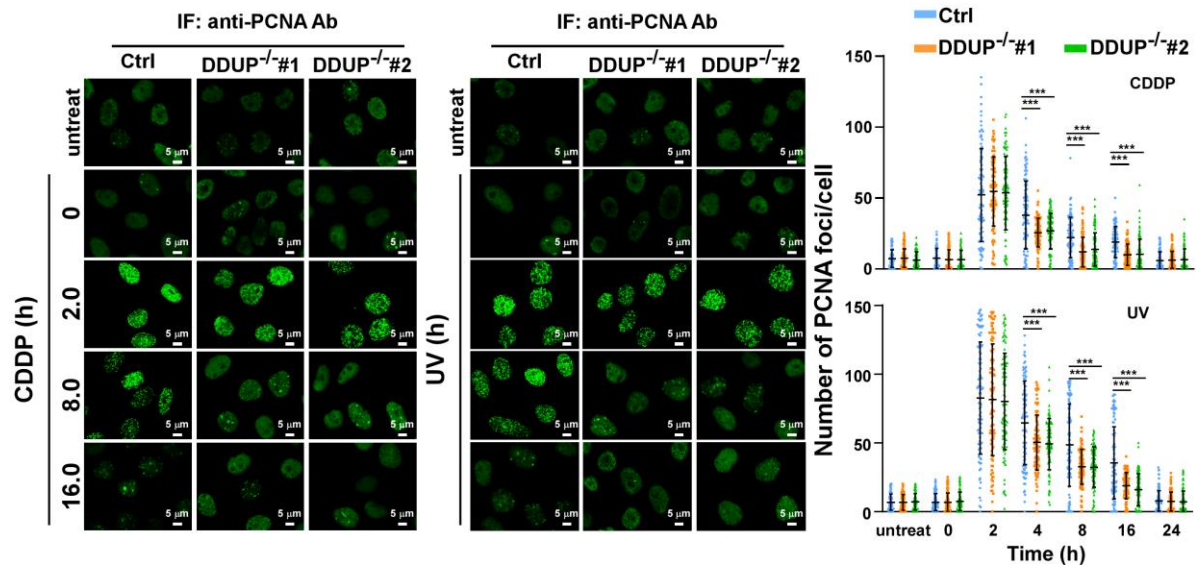

**Supplementary Figure S6. DDUP enhances the retention of RAD18 at DNA damage sites. A.** IF quantification of RPA2-foci using anti-RPA2 antibody (left) and RAD51-foci using anti-RAD51 antibody (right) in the indicated cells treated with CPT (10  $\mu$ M, 1h). **B.** IB analysis of RAD18 expression in scramble- and RAD18 siRNAs-transfected HeLa/DDUP cells. GAPDH served as a loading control. **C.** Quantification of  $\gamma$ -H2AX foci determined by IF staining using anti- $\gamma$ -H2AX antibody in the indicated cells treated with CPT (10  $\mu$ M, 1h). **D.** Percentage of GFP+ and mCherry+ cells, gated on BFP+, of three biological replicates. **E.** IB analysis of expression of DNA-bound and total monoubiquitinated

PCNA and DDUP in the indicated DDUP-KO HeLa cells treated with CDDP (5  $\mu$ M, 1h) or UV radiation (60 J/m<sup>2</sup>). H3 and  $\alpha$ -Tubulin served as a loading control. **F.** Representative images (left) and time course (right) of the formation of PCNA foci in untreated or CDDP (5  $\mu$ M)- or UV radiation (60 J/m<sup>2</sup>)-treated control and DDUP-KO HeLa cells, and allowed to recover for the indicated times. Each error bar represents the mean  $\pm$  SD of three independent experiments (\* $p$  < 0.05, \*\* $p$  < 0.01, \*\*\* $p$  < 0.001).

## Supplementary Figure S7

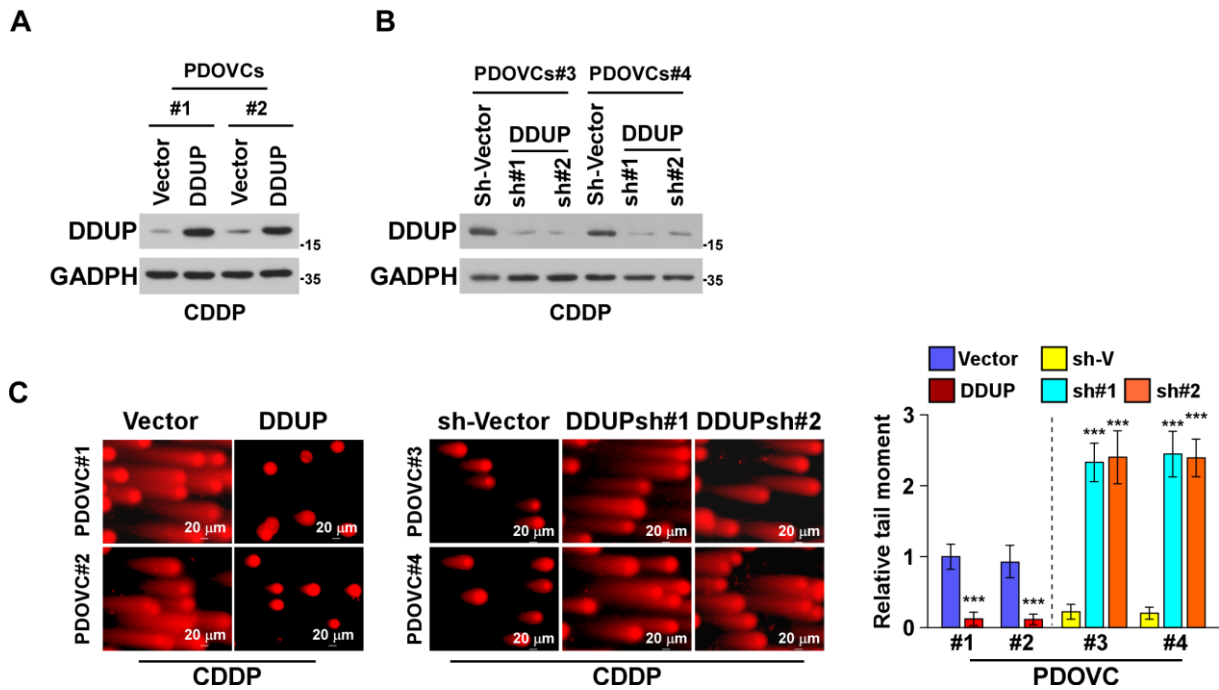

### Supplementary Figure S7. Upregulation of DDUP confers resistance to cisplatin in ovarian

**cancer cells *in vitro*.** **A-B.** IB analysis of DDUP expression in Vector- or DDUP-transduced PDOVCs #1 and #2 (**A**) or sh-vector- or DDUP shRNA(s)-transduced PDOVCs #3 and #4 (**B**). GAPDH served as a loading control. **C.** Representative images (left) and quantification (right) of damaged DNA in the indicated cells analysed by comet assay ( $n = 100$ ). The indicated cells treated with CDDP(5  $\mu$ M) for 1 hour. Scale bar = 5  $\mu$ m. Each error bar represents the mean  $\pm$  SD of three independent experiments (\* $p < 0.05$ , \*\* $p < 0.01$ , \*\*\* $p < 0.001$ ).

## Supplementary Tables

**Supplementary Table 1. Label-free quantitative (LFQ) mass spectrometry analysis of the potential DDUP-interacting proteins in CPT- vs. Vehicle-treated cells**

| Accessions             | Gene name | Vehicle _rep1 | Vehicle _rep2 | CPT_ rep1 | CPT_ rep2 | Log2 FC | P value  |
|------------------------|-----------|---------------|---------------|-----------|-----------|---------|----------|
| sp Q13535 ATR_HUMAN    | ATR       | NA            | NA            | 24.99     | 24.67     | 4.81    | 7.25E-06 |
| sp Q9NS91 RAD18_HUMAN  | RAD18     | NA            | NA            | 24.30     | 24.51     | 4.12    | 7.12E-05 |
| sp O43502 RAD51C_HUMAN | RAD51C    | NA            | NA            | 24.30     | 24.50     | 4.12    | 7.12E-05 |
| sp Q00839 HNRPU_HUMAN  | HNRNPU    | 20.26         | 20.81         | 24.02     | 23.95     | 3.45    | 8.03E-05 |
| sp P62805 H4_HUMAN     | H4C1      | 22.25         | 21.84         | 24.76     | 24.96     | 2.82    | 1.34E-04 |
| sp P06748 NPM1_HUMAN   | NPM1      | 23.50         | 23.81         | 26.41     | 26.41     | 2.75    | 8.17E-05 |
| sp P23527 H2B1O_HUMAN  | H2BC17    | 22.67         | 22.92         | 25.49     | 25.49     | 2.64    | 8.38E-05 |
| NR_033339.1 DDUP       | DDUP      | NA            | NA            | 22.89     | 22.83     | 2.61    | 1.16E-04 |
| sp P16104 H2AX_HUMAN   | H2AX      | NA            | NA            | 22.04     | 22.42     | 2.46    | 2.09E-04 |
| sp P78347 GTF2I_HUMAN  | GTF2I     | NA            | NA            | 22.61     | 22.42     | 2.18    | 2.75E-04 |
| sp P11940 PABP1_HUMAN  | PABPC1    | 23.34         | 23.20         | 25.20     | 25.5      | 2.08    | 3.03E-04 |
| sp Q9Y2X3 NOP58_HUMAN  | NOP58     | 25.92         | 25.92         | 28.11     | 27.98     | 2.02    | 2.42E-04 |

**Supplementary Table 2. Primers and Oligonucleotides used in this study**

| <b>Primer used for qPCR</b>                                |                                                                                 |
|------------------------------------------------------------|---------------------------------------------------------------------------------|
| CTBP1-DT-up                                                | 5'-CCATCCTCTGCAGCAAGTCA -3'                                                     |
| CTBP1-DT-dn                                                | 5'-CTCCGTTCTCAGTTGCCTGT-3'                                                      |
| GAPDH-up                                                   | 5'-GGAGCGAGATCCCTCCAAAAT -3'                                                    |
| GAPDH-dn                                                   | 5'-GGCTGTTGTCATACTTCTCATGG-3'                                                   |
| <b>Primer used for subcloning and plasmid construction</b> |                                                                                 |
| CTBP1-DT-up                                                | 5'-GCCGCCACGTCAGCGCCTG-3'                                                       |
| CTBP1-DT-dn                                                | 5'-TGGCAGTTTTTCAGCGATTGT-3'                                                     |
| DDUP-Flag-up                                               | 5'-gtgtcgtgaggattgggatccgccATGTGGTTGGTGGAGTGCACA-3'                             |
| DDUP-Flag-dn                                               | 5'-gaagaattcgtccgggatccTCACTTATCGTCGTCATCCTTGTAAATC<br>TGATAACGCGCTGACAAGC-3'   |
| ATG1mDDUP-up                                               | 5'-GGGACGATtTGGTTGGTGGAGTGCACAGGCAG-3'                                          |
| ATG1mDDUP-dn                                               | 5'-ACCAACCAaATCGTCCCTTCCCGGCAGCCTCA-3'                                          |
| ATG2mDDUP-up                                               | 5'-CTCAGCATtGACAGGCAGCCAGGAGAAGGCA-3'                                           |
| ATG2mDDUP-dn                                               | 5'-TGCCTGTCaATGCTGAGCAGACAGGAAAGTCC-3'                                          |
| DDUP/T174A-up                                              | 5'-CGTCTACgCACAGTGTTCTGTCTGCACAGCTTG-3'                                         |
| DDUP/T174A-dn                                              | 5'-AACACTGTGcGTAGACGGAGGCCATGGAGAGT-3'                                          |
| DDUP/T174D-up                                              | 5'-CGTCTACgacCAGTGTTCTGTCTGCACAGCTTG-3'                                         |
| DDUP/T174D-dn                                              | 5'-AACACTGgtcGTAGACGGAGGCCATGGAGAGT-3'                                          |
| Flag-DDUP/N-up                                             | 5'-gtgtcgtgaggattgggatccgccATGGATTACAAGGATGACGACGATAAG<br>TGGTTGGTGGAGTGCACA-3' |
| Flag-DDUP/N-dn                                             | 5'-gaagaattcgtccgggatccTCAATCACAACCTGACTTGCTGC-3'                               |
| Flag-DDUP/ΔC-up                                            | 5'-gtgtcgtgaggattgggatccgccATGGATTACAAGGATGACGACGATAAG<br>TGGTTGGTGGAGTGCACA-3' |
| Flag-DDUP/ΔC-dn                                            | 5'-gaagaattcgtccgggatccTCAGGAGAGGAACTGTTCTTCTGG-3'                              |
| Flag-DDUP/C-up                                             | 5'-gtgtcgtgaggattgggatccgccATGGATTACAAGGATGACGACGATAAG<br>AGGATCCACTTCCTGCGC-3' |
| Flag-DDUP/C-dn                                             | 5'-gaagaattcgtccgggatccTCATGATAACGCGCTGACAAGC-3'                                |

| <b>Primer used for CRISPR Cas9 System</b> |                                                                    |
|-------------------------------------------|--------------------------------------------------------------------|
| gRNA#1                                    | 5'-GGTTGGTGGAGTGCACAGGCAGG-3'                                      |
| gRNA#2                                    | 5'-TGCACAGGCAGGGACCTCACTGG-3'                                      |
| CTBP1-DT-up                               | 5'-TTATTAGTCGGTGTGTTCACTATC-3'                                     |
| CTBP1-DT-dn                               | 5'-AGCAGAGGGTAGAATGGTGTT-3'                                        |
| <b>shRNA</b>                              |                                                                    |
| ShRNA#1_CTBP1<br>-DT                      | 5'-ACCTCGGAATGATGCAGACTCCTATCTCAAGAGGATAGGAGTCTGCA<br>TCATTCCTT-3' |
| ShRNA#2_CTBP1<br>-DT                      | 5'-ACCTCGTTCGTCTGCACAGCTTGTCATCAAGAGTGACAAGCTGTGC<br>AGACGAACTT-3' |
| <b>siRNA</b>                              |                                                                    |
| Si RAD18#1                                | 5'-GACCAAAGAGACACGTTCTGT-3'                                        |
| Si RAD18#2                                | 5'-GCTGTTTATCACGCGAAGAGA-3'                                        |
| Si DDUP#1                                 | 5'-GGAAUGAUGCAGACUCCUAUC-3'                                        |
| Si DDUP#2                                 | 5'-GTTTCGTCTGCACAGCTTGTC-3'                                        |
| Si H2AX#1                                 | 5'-TGGACTAATTTTATTAAAGGATT-3'                                      |
| Si H2AX#2                                 | 5'-GACTAATTTTATTAAAGGATTGT-3'                                      |



**Supplementary Table 3. Clinicopathological characteristics of clinical samples and expression of DDUP in platinum-treated Ovarian Cancer**

| Characteristics              | No. patients | DDUP expression |              | P value |
|------------------------------|--------------|-----------------|--------------|---------|
|                              |              | Low (n=217)     | High (n=150) |         |
| <b>Age (years)</b>           |              |                 |              |         |
| ≤ 62                         | 192          | 109             | 83           | 0.336   |
| > 62                         | 175          | 108             | 67           |         |
| <b>Histological type</b>     |              |                 |              |         |
| Serous                       | 270          | 158             | 112          | 0.378   |
| Endometrioid                 | 43           | 26              | 17           |         |
| Mucinous                     | 23           | 11              | 12           |         |
| Undifferentiated             | 31           | 22              | 9            |         |
| <b>FIGO stage</b>            |              |                 |              |         |
| I /II                        | 89           | 61              | 28           | 0.038   |
| III/IV                       | 278          | 156             | 122          |         |
| <b>Histologic grade</b>      |              |                 |              |         |
| 1                            | 31           | 15              | 16           | 0.101   |
| 2                            | 75           | 34              | 41           |         |
| 3                            | 261          | 168             | 93           |         |
| <b>Chemo-response status</b> |              |                 |              |         |
| Chemoresistance              | 190          | 60              | 130          | <0.001  |
| Chemosensitivity             | 177          | 157             | 20           |         |
| <b>Recurrence</b>            |              |                 |              |         |
| Yes                          | 248          | 111             | 137          | <0.001  |
| No                           | 119          | 106             | 13           |         |
| <b>Vital status</b>          |              |                 |              |         |
| Alive                        | 143          | 112             | 31           | <0.001  |
| Dead                         | 224          | 105             | 119          |         |

**Supplementary Table 4. Univariate and multivariate analysis of different prognostic parameters in patients with ovarian cancer by Cox-regression analysis.**

|                       | Univariate analysis |                       | Multivariate analysis |                       |
|-----------------------|---------------------|-----------------------|-----------------------|-----------------------|
|                       | <i>P</i>            | Hazard ratio (95% CI) | <i>P</i>              | Hazard ratio (95% CI) |
| Age (years)           | 0.137               | 0.819 (0.629-1.065)   |                       |                       |
| Histological type     | 0.002               | 0.773(0.659-0.907)    | 0.006                 | 0.776 (0.648-0.929)   |
| Histologic grade      | < 0.001             | 0.673 (0.547-0.829)   | 0.007                 | 0.734 (0.585-0.920)   |
| FIGO stage            | 0.001               | 1.847 (1.267-2.691)   | 0.013                 | 1.664 (1.111-2.491)   |
| Recurrence            | < 0.001             | 3.068 (2.170-4.336)   | < 0.001               | 2.479 (1.545-3.978)   |
| Chemo-response status | < 0.001             | 2.171 (1.642-2.869)   | 0.009                 | 0.548 (0.349-0.861)   |
| DDUP expression       | < 0.001             | 3.157 (2.401-4.152)   | < 0.001               | 2.797 (1.974-3.963)   |
